# Supplementary material
Source: publisher figshare collection journal article supplement (https://frontiersin.figshare.com/ndownloader/files/14047301)
Supplement: Supplementary file [file 14047301]

## Appendix A

Linear mixed effects model for three time point analysis including crossover effects.

|                                 | GABA               |         |                    |         | Glx                |         |                    |         | NAA                 |         |                    |         |
|---------------------------------|--------------------|---------|--------------------|---------|--------------------|---------|--------------------|---------|---------------------|---------|--------------------|---------|
|                                 | Full LME           |         | Crossover LME      |         | Full LME           |         | Crossover LME      |         | Full LME            |         | Crossover LME      |         |
|                                 | B (95%CI)          | p-value | B (95%CI)          | p-value | B (95%CI)          | p-value | B (95%CI)          | p-value | B (95%CI)           | p-value | B (95%CI)          | p-value |
| Intercept                       | 3.16 (2.93,3.38)   | <0.001  | 3.21 (2.98,3.44)   | <0.001  | 8.1 (7.53,8.68)    | <0.001  | 8.22 (7.63,8.81)   | <0.001  | 10.47 (10.13,10.82) | <0.001  | 10.77 (10.43,11.1) | <0.001  |
| Time                            | -                  | 0.756   | -                  | 0.562   | -                  | 0.329   | -                  | 0.143   | -                   | 0.376   | -                  | 0.556   |
| dur1 vs. pre1                   | -0.06 (-0.32,0.21) | -       | -0.11 (-0.3,0.07)  | -       | 0.01 (-0.67,0.7)   | -       | 0.06 (-0.43,0.55)  | -       | 0.18 (-0.17,0.53)   | -       | -0.04 (-0.29,0.21) | -       |
| post1 vs. pre1                  | -0.14 (-0.41,0.12) | -       | -0.12 (-0.3,0.07)  | -       | 0.53 (-0.16,1.21)  | -       | 0.35 (-0.14,0.84)  | -       | 0.17 (-0.18,0.51)   | -       | -0.01 (-0.26,0.25) | -       |
| pre2 vs. pre1                   | -0.08 (-0.4,0.25)  | -       | -                  | -       | -0.35 (-1.16,0.46) | -       | -                  | -       | 0.5 (0.01,0.98)     | -       | -                  | -       |
| dur2 vs. pre1                   | -0.25 (-0.57,0.08) | -       | -                  | -       | -0.25 (-1.06,0.57) | -       | -                  | -       | 0.23 (-0.25,0.72)   | -       | -                  | -       |
| post2 vs. pre1                  | -0.16 (-0.49,0.16) | -       | -                  | -       | -0.18 (-0.99,0.64) | -       | -                  | -       | 0.32 (-0.17,0.8)    | -       | -                  | -       |
| Cross over effect               | -                  | -       | -0.06 (-0.17,0.05) | 0.671   | -                  | -       | -0.19 (-0.48,0.09) | 0.902   | -                   | -       | -0.03 (-0.18,0.12) | 0.813   |
| Group effect                    | -0.15 (-0.47,0.18) | 0.983   | -0.15 (-0.34,0.03) | 0.132   | -0.02 (-0.83,0.8)  | 0.224   | 0.13 (-0.36,0.62)  | 0.764   | 0.47 (-0.02,0.95)   | 0.336   | 0.13 (-0.12,0.38)  | 0.374   |
| Change between groups over time | -                  | 0.92    | -                  | 0.262   | -                  | 0.527   | -                  | 0.172   | -                   | 0.428   | -                  | 0.679   |
| dur1 vs. pre1                   | 0 (-0.37,0.37)     | -       | 0.11 (-0.16,0.37)  | -       | -0.05 (-1.02,0.92) | -       | -0.15 (-0.85,0.54) | -       | -0.34 (-0.83,0.14)  | -       | -0.11 (-0.47,0.24) | -       |
| post1 vs. pre1                  | 0.1 (-0.27,0.47)   | -       | 0.1 (-0.16,0.36)   | -       | -0.5 (-1.46,0.47)  | -       | -0.11 (-0.8,0.58)  | -       | -0.08 (-0.56,0.41)  | -       | -0.08 (-0.44,0.28) | -       |
| pre2 vs. pre1                   | -0.01 (-0.54,0.52) | -       | -                  | -       | 0.3 (-1.01,1.6)    | -       | -                  | -       | -0.68 (-1.51,0.16)  | -       | -                  | -       |
| dur2 vs. pre1                   | 0.21 (-0.32,0.74)  | -       | -                  | -       | 0.04 (-1.27,1.35)  | -       | -                  | -       | -0.56 (-1.39,0.28)  | -       | -                  | -       |
| post2 vs. pre1                  | 0.09 (-0.44,0.63)  | -       | -                  | -       | 0.57 (-0.73,1.88)  | -       | -                  | -       | -0.76 (-1.6,0.07)   | -       | -                  | -       |

Pre = pre-stimulation window, dur = during stimulation window, post = post-stimulation window. Numbers denote session 1 = first, 2 = second. LME = linear mixed effects model. 95% CI = 95% confidence interval.

## Appendix B

Linear mixed effects model for five time point analysis including crossover effects.

|                                 | GABA               |         |                    |         | Glx                |         |                    |         | NAA                 |         |                     |         |
|---------------------------------|--------------------|---------|--------------------|---------|--------------------|---------|--------------------|---------|---------------------|---------|---------------------|---------|
|                                 | Full LME           |         | Crossover LME      |         | Full LME           |         | Crossover LME      |         | Full LME            |         | Crossover LME       |         |
|                                 | B (95%CI)          | p-value | B (95%CI)          | p-value | B (95%CI)          | p-value | B (95%CI)          | p-value | B (95%CI)           | p-value | B (95%CI)           | p-value |
| Intercept                       | 3.16 (2.91,3.4)    | <0.001  | 3.21 (2.99,3.43)   | <0.001  | 8.1 (7.49,8.72)    | <0.001  | 8.18 (7.6,8.76)    | <0.001  | 10.47 (10.11,10.84) | <0.001  | 10.75 (10.43,11.08) | <0.001  |
| Time                            | -                  | 0.826   | -                  | 0.808   | -                  | 0.124   | -                  | 0.176   | -                   | 0.606   | -                   | 0.582   |
| dur1-1 vs. pre1                 | -0.13 (-0.41,0.15) | -       | -0.11 (-0.31,0.09) | -       | 0.09 (-0.67,0.85)  | -       | -0.02 (-0.56,0.53) | -       | 0.12 (-0.26,0.49)   | -       | -0.07 (-0.34,0.2)   | -       |
| dur1-2 vs. pre1                 | -0.02 (-0.3,0.26)  | -       | -0.09 (-0.29,0.11) | -       | -0.1 (-0.86,0.67)  | -       | 0.03 (-0.52,0.57)  | -       | 0.11 (-0.27,0.48)   | -       | -0.03 (-0.3,0.24)   | -       |
| post1-1 vs. pre1                | -0.13 (-0.41,0.15) | -       | -0.08 (-0.29,0.12) | -       | 0.77 (0.01,1.53)   | -       | 0.41 (-0.14,0.96)  | -       | 0.03 (-0.34,0.4)    | -       | -0.09 (-0.36,0.18)  | -       |
| post1-2 vs. pre1                | -0.1 (-0.38,0.19)  | -       | -0.14 (-0.34,0.06) | -       | 0.21 (-0.56,0.97)  | -       | 0.29 (-0.26,0.84)  | -       | 0.15 (-0.22,0.53)   | -       | 0.04 (-0.22,0.31)   | -       |
| pre2 vs. pre1                   | -0.08 (-0.42,0.27) | -       | -                  | -       | -0.35 (-1.22,0.52) | -       | -                  | -       | 0.5 (-0.02,1.02)    | -       | -                   | -       |
| dur2-1 vs. pre1                 | -0.17 (-0.51,0.18) | -       | -                  | -       | -0.47 (-1.34,0.4)  | -       | -                  | -       | 0.24 (-0.28,0.76)   | -       | -                   | -       |
| dur2-2 vs. pre1                 | -0.24 (-0.58,0.11) | -       | -                  | -       | -0.2 (-1.07,0.66)  | -       | -                  | -       | 0.33 (-0.19,0.85)   | -       | -                   | -       |
| post2-1 vs. pre1                | -0.12 (-0.47,0.23) | -       | -                  | -       | -0.3 (-1.17,0.56)  | -       | -                  | -       | 0.28 (-0.24,0.8)    | -       | -                   | -       |
| post2-2 vs. pre1                | -0.26 (-0.6,0.09)  | -       | -                  | -       | 0.03 (-0.84,0.9)   | -       | -                  | -       | 0.43 (-0.08,0.95)   | -       | -                   | -       |
| Cross over effect               | -                  | -       | -0.06 (-0.15,0.03) | 0.961   | -                  | -       | -0.17 (-0.41,0.08) | 0.989   | -                   | -       | -0.02 (-0.14,0.1)   | 0.404   |
| Group effect                    | -0.15 (-0.5,0.2)   | 0.999   | -0.15 (-0.35,0.05) | 0.038   | -0.02 (-0.88,0.85) | 0.095   | 0.13 (-0.42,0.68)  | 0.516   | 0.47 (-0.05,0.99)   | 0.51    | 0.13 (-0.14,0.4)    | 0.821   |
| Change between groups over time | -                  | 0.99    | -                  | 0.158   | -                  | 0.504   | -                  | 0.175   | -                   | 0.541   | -                   | 0.737   |
| dur1-1 vs. pre1                 | 0.07 (-0.33,0.46)  | -       | 0.09 (-0.2,0.37)   | -       | -0.07 (-1.14,1.01) | -       | -0.07 (-0.84,0.71) | -       | -0.17 (-0.7,0.35)   | -       | -0.05 (-0.44,0.33)  | -       |
| dur1-2 vs. pre1                 | -0.08 (-0.48,0.32) | -       | 0.05 (-0.24,0.33)  | -       | -0.06 (-1.13,1.02) | -       | -0.02 (-0.8,0.76)  | -       | -0.46 (-0.99,0.07)  | -       | -0.27 (-0.65,0.11)  | -       |
| post1-1 vs. pre1                | 0.04 (-0.36,0.44)  | -       | 0.05 (-0.24,0.33)  | -       | -0.55 (-1.63,0.52) | -       | -0.18 (-0.96,0.6)  | -       | 0.12 (-0.4,0.65)    | -       | 0 (-0.38,0.39)      | -       |
| post1-2 vs. pre1                | 0.08 (-0.32,0.48)  | -       | 0.1 (-0.18,0.39)   | -       | -0.26 (-1.33,0.82) | -       | 0.02 (-0.76,0.79)  | -       | -0.28 (-0.81,0.25)  | -       | -0.26 (-0.64,0.12)  | -       |
| pre2 vs. pre1                   | -0.01 (-0.58,0.57) | -       | -                  | -       | 0.3 (-1.06,1.66)   | -       | -                  | -       | -0.68 (-1.57,0.22)  | -       | -                   | -       |
| dur2-1 vs. pre1                 | 0.1 (-0.47,0.67)   | -       | -                  | -       | 0.23 (-1.13,1.59)  | -       | -                  | -       | -0.61 (-1.51,0.28)  | -       | -                   | -       |
| dur2-2 vs. pre1                 | 0.16 (-0.41,0.74)  | -       | -                  | -       | 0.31 (-1.05,1.67)  | -       | -                  | -       | -0.76 (-1.65,0.14)  | -       | -                   | -       |
| post2-1 vs. pre1                | 0.05 (-0.53,0.62)  | -       | -                  | -       | 0.49 (-0.87,1.85)  | -       | -                  | -       | -0.79 (-1.68,0.1)   | -       | -                   | -       |
| post2-2 vs. pre1                | 0.11 (-0.46,0.69)  | -       | -                  | -       | 0.59 (-0.77,1.95)  | -       | -                  | -       | -0.91 (-1.81,-0.02) | -       | -                   | -       |

Pre = pre-stimulation window, dur = during stimulation window, post = post-stimulation window. Numbers x-y denote session and window number, where x = denotes the session and y- denotes the window. LME = linear mixed effects model. 95% CI = 95% confidence interval.
